# Supplementary material for: Speed Controls in Translating Secretory Proteins in Eukaryotes - an Evolutionary Perspective
Source: PubMed Central journal article supplement (PMC3879104; doi:10.1371/journal.pcbi.1003294), 2014-01-02

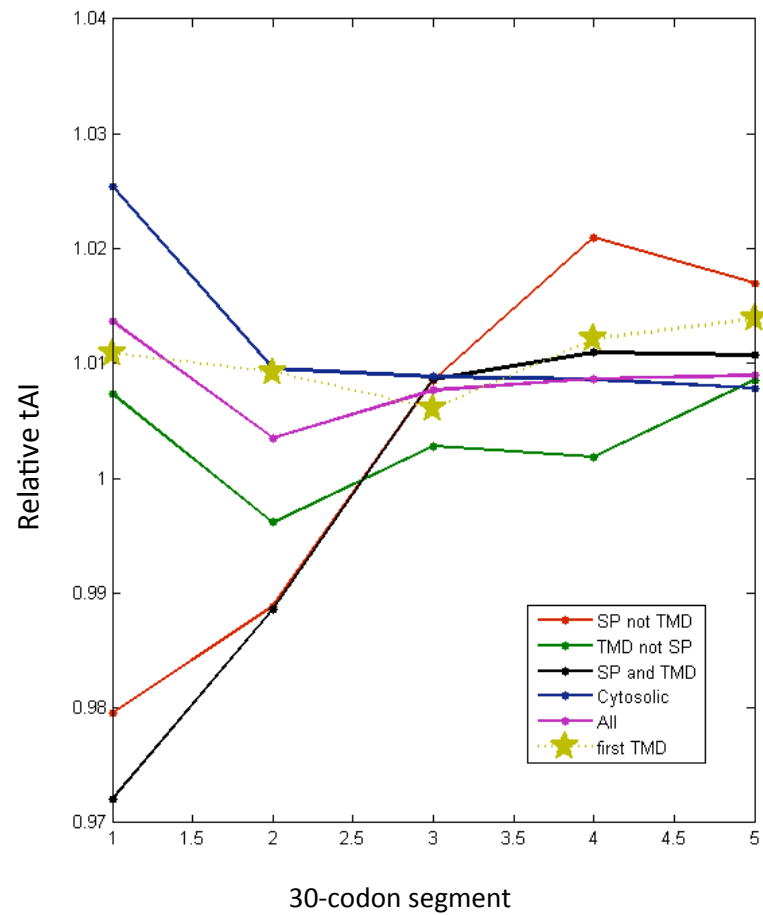

Supplement: pcbi.1003294.s001.pdf [file pcbi.1003294.s001.pdf]
